# Supplementary material for: Identification of a novel matrix metalloproteinases-related prognostic signature in hepatocellular carcinoma
Source: publisher site journal article supplement (doi:10.18632/aging.205832), 2024-05-16
Supplement: Supplementary file [file aging-v16i10-205832-supplementary-material-SD1.pdf]

SUPPLEMENTARY FIGURES

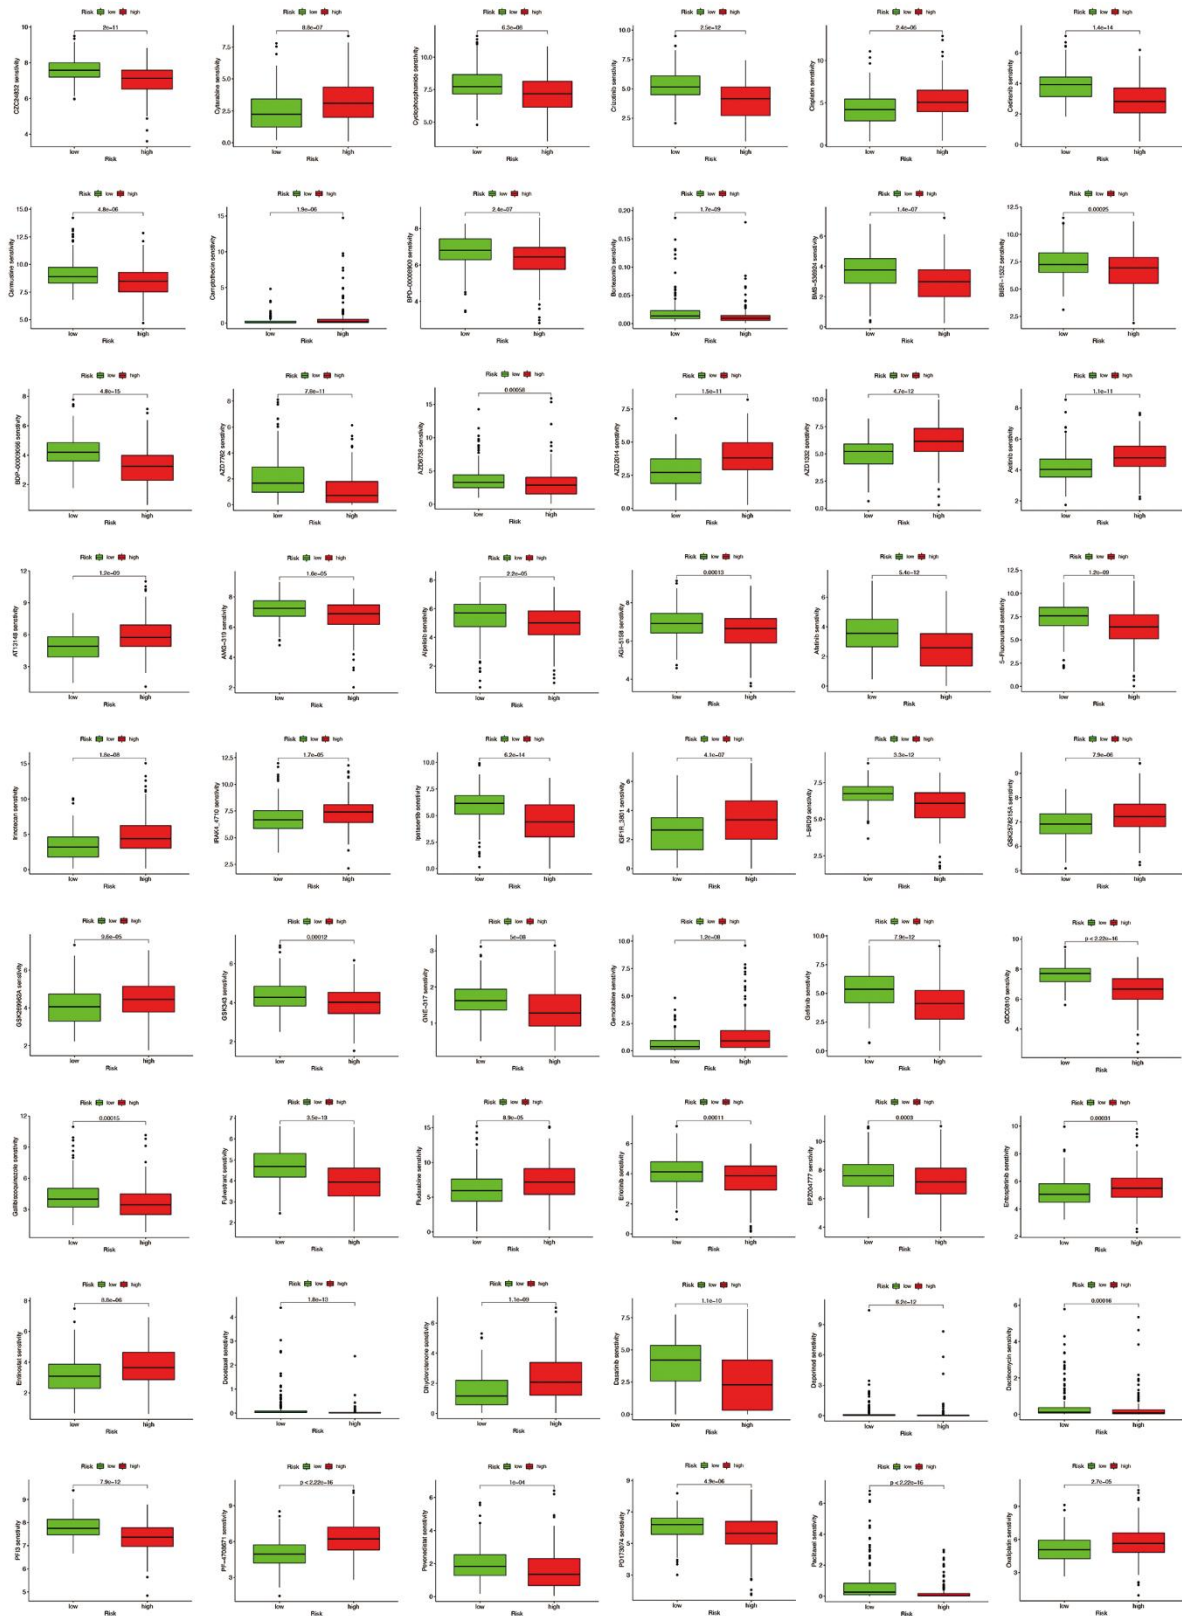

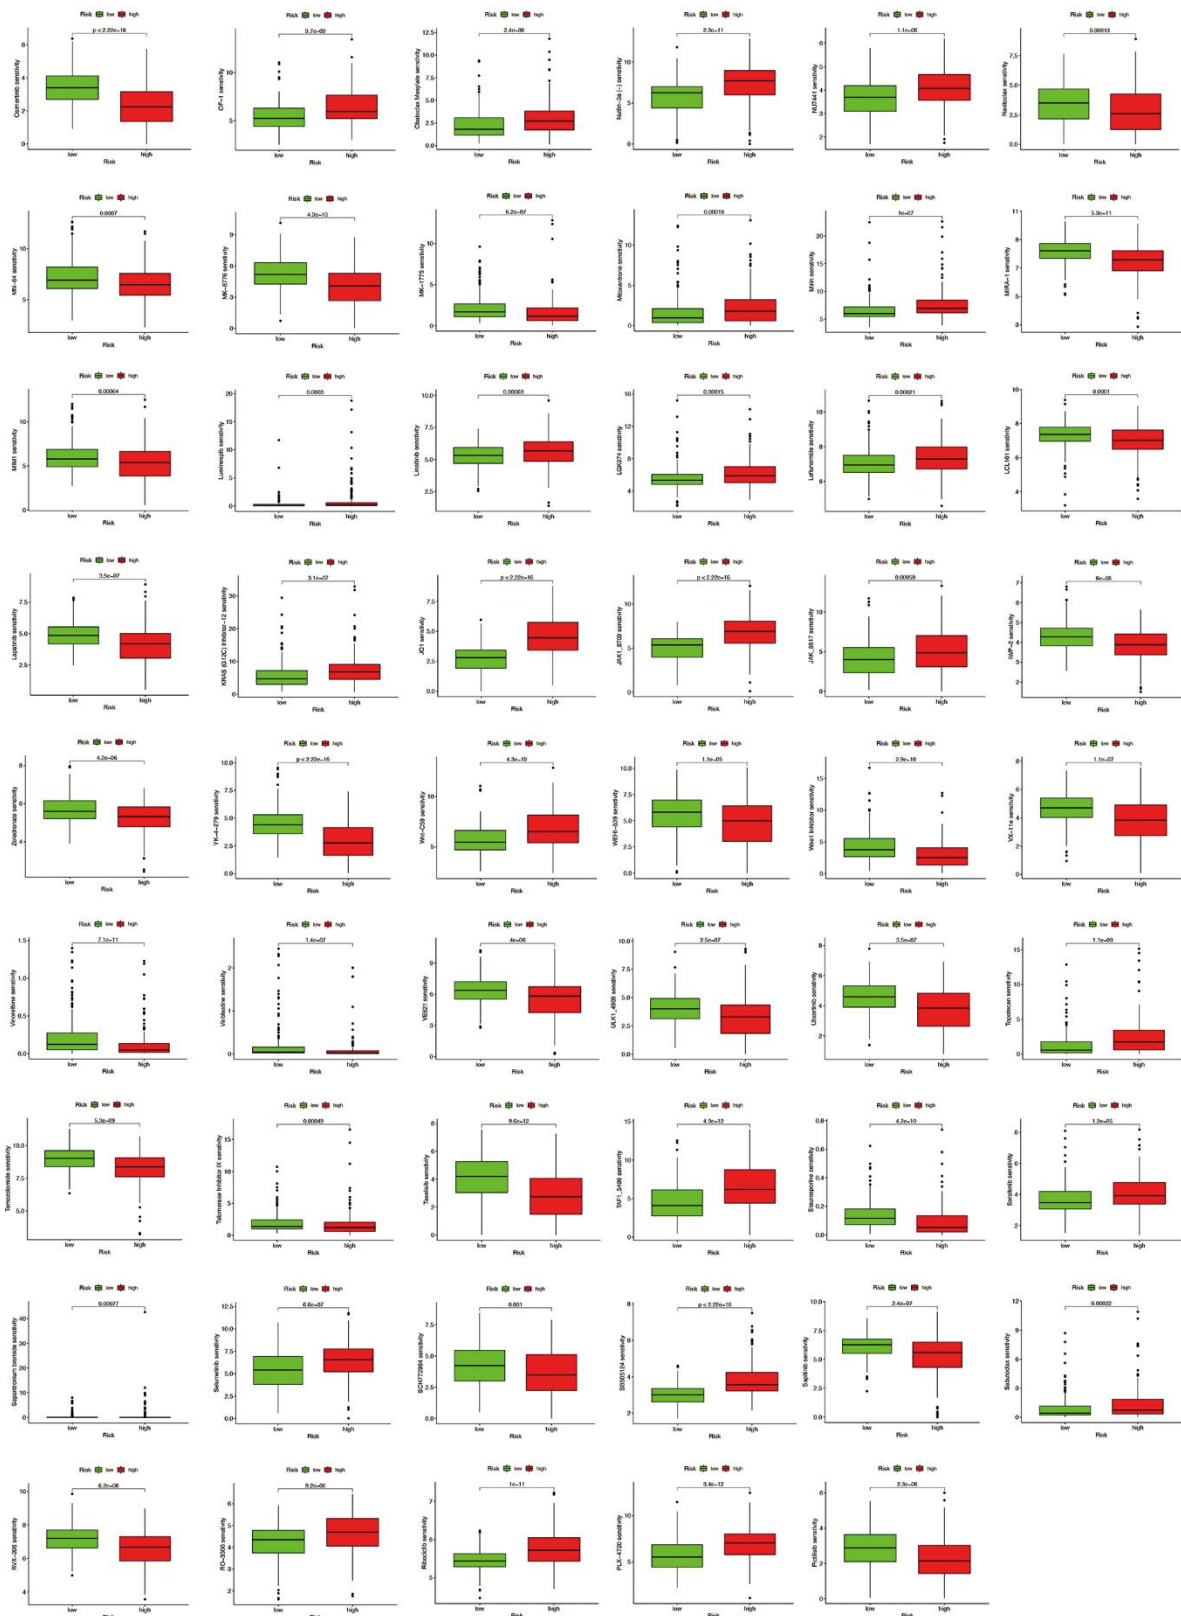

Supplementary Figure 1. Comparison of the sensitivity of various chemotherapeutic agents in distinct risk groups of the TCGA-LIHC cohort.

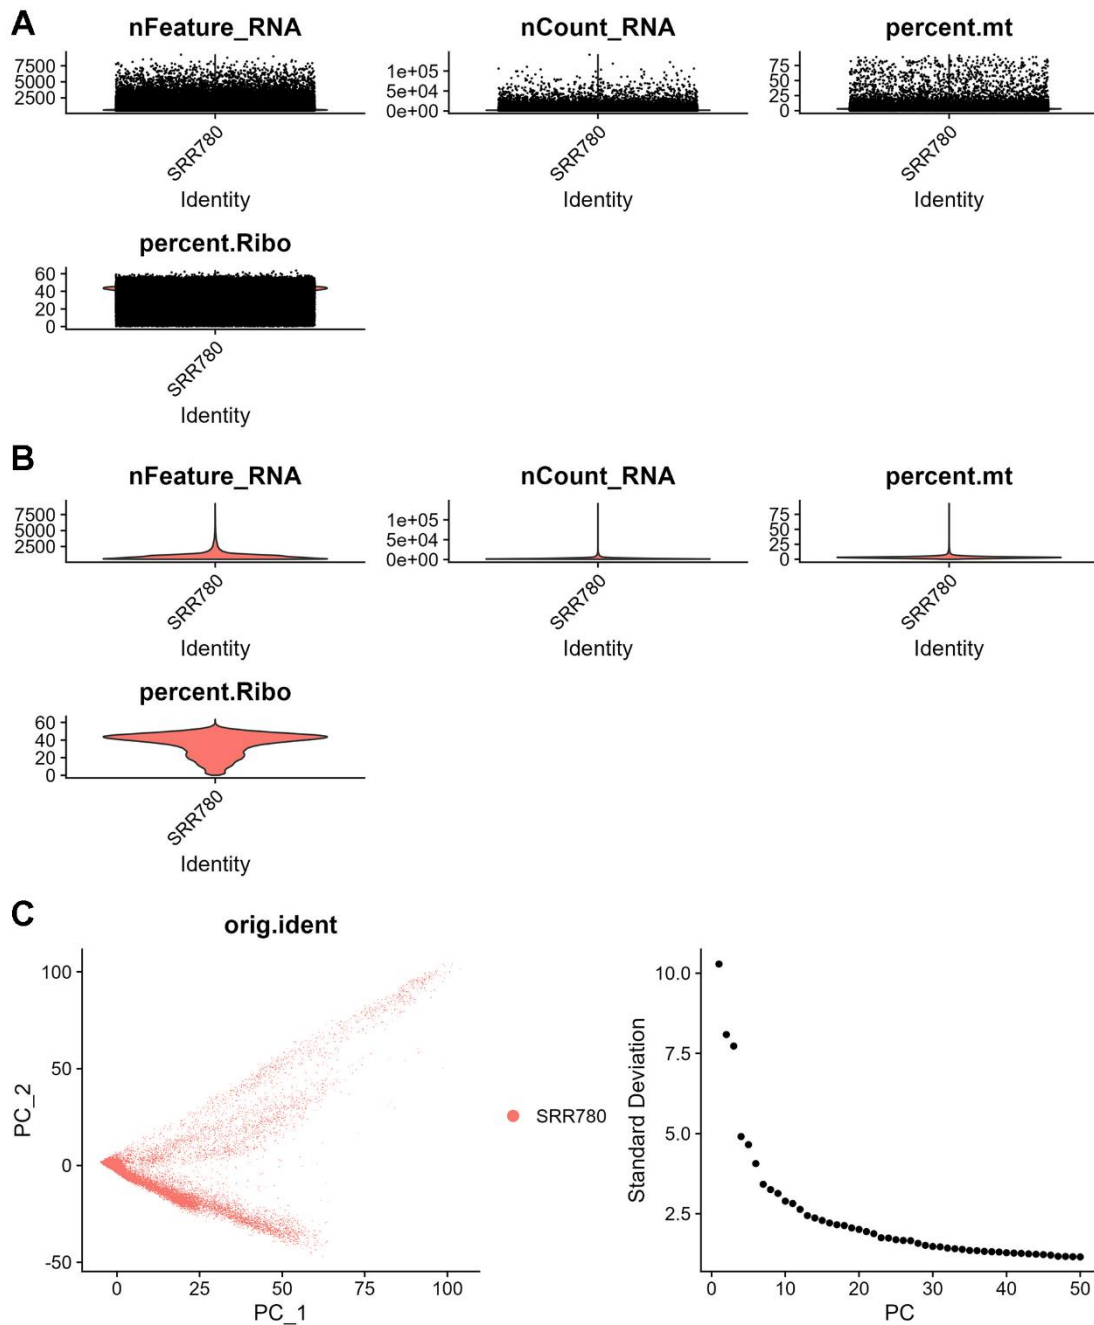

**Supplementary Figure 2. Single-cell RNA-seq profiling in hepatocellular carcinoma.** (A, B) The Seurat package is used to filter data from individual cells. (C) Utilizing dimensionality reduction and the Seurat package, single-cell data can be clustered.
