# Supplementary material for: Identification of a novel matrix metalloproteinases-related prognostic signature in hepatocellular carcinoma
Source: Aging (Albany NY). 2024 May 16;16(10):8667–86. doi: 10.18632/aging.205832 (PMC11164509; doi:10.18632/aging.205832)
Supplement: Supplementary Table 1 [file aging-16-205832-s002.xlsx]

## Sheet: Sheet1
Supplementary Table 1. The matrix metalloproteinases related genes in Mammalian Degradome database.
ENPEP
RNPEP
RNPEP
ANPEP
ERAP1
LTA4H
TRHDE
NPEPPS
LOC440434
LNPEP
RNPEPL1
AOPEP
LVRN
TAF2
ACE
ACE2
ACE3P
THOP1
NLN
MIPEP
LMLN
MMP1
MMP2
MMP3
MMP7
MMP8
MMP9
MMP10
MMP11
MMP12
MMP13
MMP14
MMP15
MMP16
MMP17
MMP18
MMP19
MMP20
MMP21
MMP23A
MMP23B
MMP24
MMP25
MMP26
MMP27
MMP28
MEP1A
MEP1B
BMP1
TLL1
TLL2
ASTL
ADAMDEC1
ADAM1A
ADAM2
ADAM3B
ADAM4
ADAM4B
ADAM5
ADAM6
ADAM7
ADAM8
ADAM9
ADAM10
ADAM11
ADAM12
ADAM15
ADAM17
ADAM18
ADAM19
ADAM20
ADAM21
ADAM22
ADAM23
ADAM25
ADAM28
ADAM29
ADAM30
ADAM32
ADAM33
ADAMTS1
ADAMTS2
ADAMTS3
ADAMTS4
ADAMTS5
ADAMTS6
ADAMTS7
ADAMTS8
ADAMTS9
ADAMTS10
ADAMTS12
ADAMTS13
ADAMTS14
ADAMTS15
ADAMTS16
ADAMTS17
ADAMTS18
ADAMTS19
ADAMTS20
MME
MMEL1
ECE1
ECE2
ECEL1
KEL
PHEX
CPA1
CPA2
CPA3
CPA4
CPA5
CPA6
CPB1
CPB2
CPO
CPE
CPN1
CPM
CPD
CPZ
CPXM1
CPXM2
AEBP1
AGTPBP1
AGBL2
AGBL3
AGBL4
AGBL5
IDE
PMPCB
NRD1
PITRM1
INPP5E
UQCRC1
UQCRC2
LAP3
NPEPL1
DNPEP
DPEP1
DPEP2
DPEP3
CNDP2
CNDP1
PM20D2
ACY1
METAP1
METAP2
METAP1D
XPNPEP2
PEPD
XPNPEP1
XPNPEP3
PA2G4
SUPT16H
FOLH1
NAALADL1
NAALAD2
NAALADL2
CPQ
ERMP1
TFRC
TFR2
QPCT
QPCTL
CAD
DPYS
CRMP1
DPYSL2
DPYSL3
DPYSL4
DPYSL5
YME1L1
SPG7
AFG3L1P
AFG3L2
PAPPA
PAPPA2
FACE1
OMA1
DPP3
MBTPS2
AMZ1
AMZ2
PSMD14
COPS5
COPS6
STAMBP
STAMBPL1
BRCC3
MYSM1
MPND
PSMD7
PRPF8
EIF3H
EIF3F
XRCC6BP1
FACE2
ASPA
ACY3
TTR
SPRTN
OSGEP
OSGEPL1
